# Supplementary material
Source: PubMed Central journal article supplement (PMC3738232)
Supplement: jn.112.169516_nutrition169516SupplementaryData.pdf [file jn.112.169516_nutrition169516SupplementaryData.pdf]

## Online Supporting Material

**Supplemental Figure 1:** Numbers of errors during Barnes maze escape in male APP/PS1 transgenic mice supplied with or without 0.625% pomegranate in their normal drinking water for 3 month treatment were not altered.

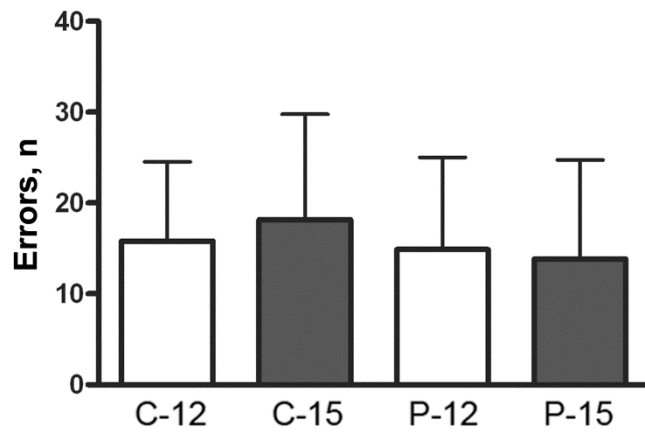

Values shown are mean  $\pm$  SD, n=4.

## Online Supporting Material

**Supplemental Figure 2:** Levels of proinflammatory cytokines IL-1 $\beta$  and IL-6 were not decreased in male APP/PS1 mice supplied with or without 0.625% pomegranate in their normal drinking water for 3 month treatment.

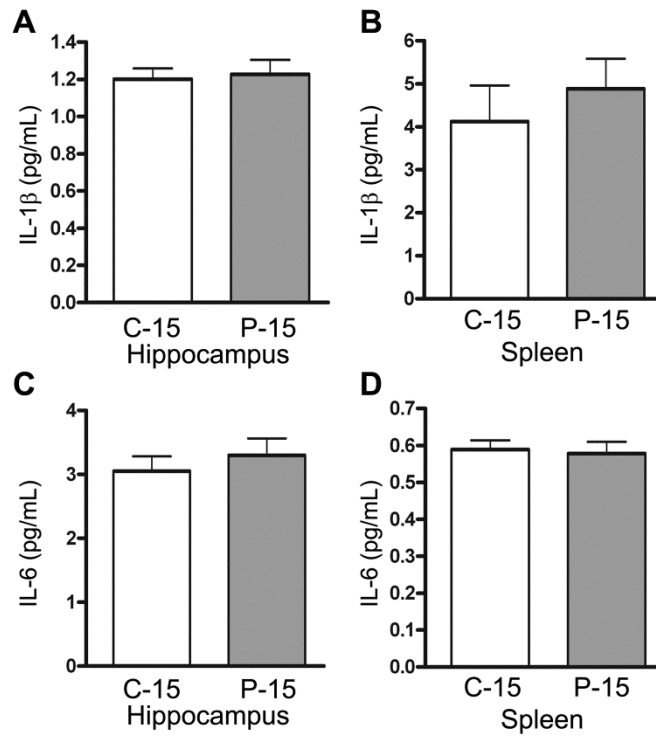

Values shown are mean  $\pm$  SD, n=4.

## Online Supporting Material

**Supplemental Figure 3:** Synaptic density did not change in brains of male APP/PS1 mice supplied with 0.625% pomegranate in their normal drinking water for 3 month treatment compared to 12 and 15 month male control APP/PS1 mice provided normal drinking water.

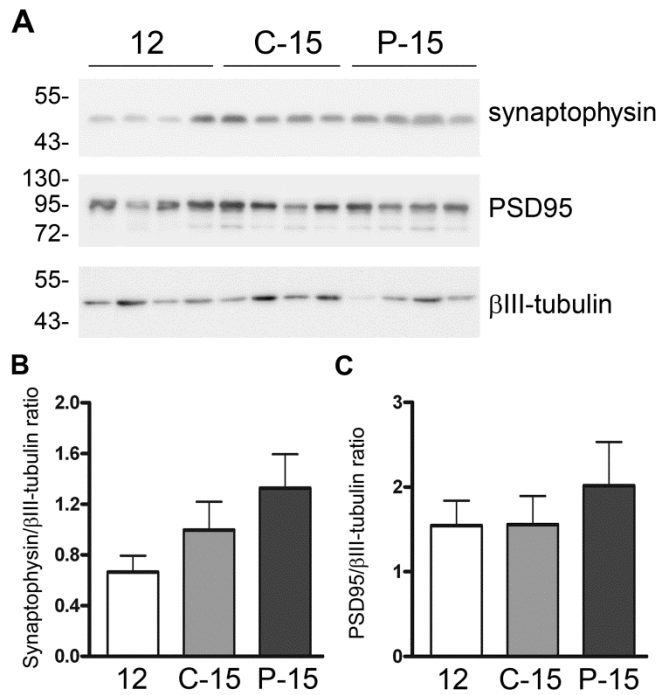

Optical density values were averaged and graphed  $\pm$  SD, n=4.

## Online Supporting Material

**Supplemental Figure 4:** Nitrotyrosine and HNE protein adduct levels did not change in brains of male APP/PS1 mice supplied with 0.625% pomegranate in their normal drinking water for 3 month treatment compared to 12 and 15 month male control APP/PS1 mice provided normal drinking water.

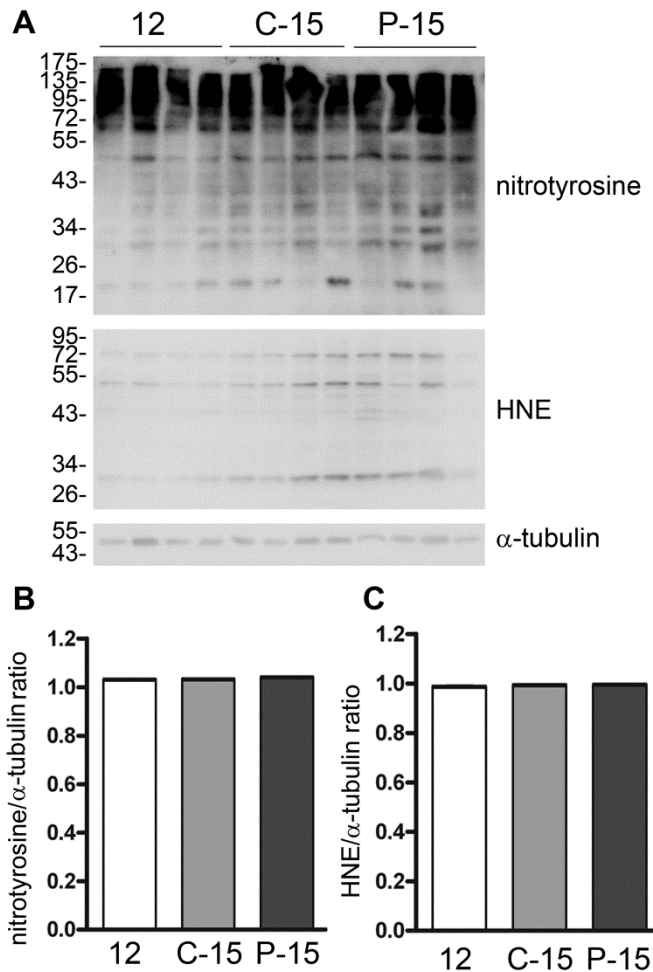

Optical density values were normalized to their respective loading control, averaged, and graphed  $\pm$  SD, n=4.

## Online Supporting Material

**Supplemental Figure 5:** Hippocampal protein levels of APP or BACE did not change in brains of male APP/PS1 mice supplied with 0.625% pomegranate in their normal drinking water for 3 month treatment compared to 12 and 15 month male control APP/PS1 mice provided normal drinking water.

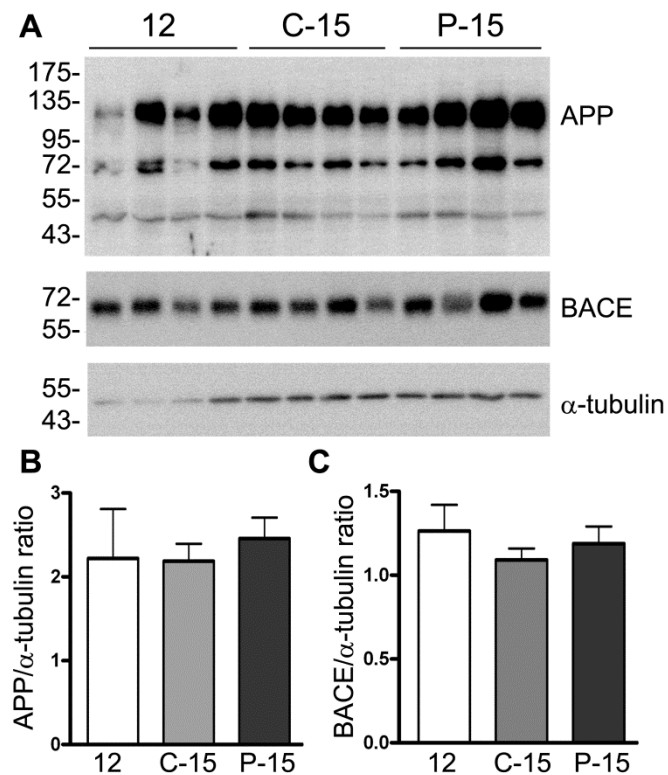

Optical density values were normalized to their respective loading control, averaged, and graphed  $\pm$  SD, n=4.

## Online Supporting Material

**Supplemental Figure 6:** Pomegranate extract components, ellagic acid and punicalagin were not toxic to primary cortical microglia cell culture stimulated with or without A $\beta$ .

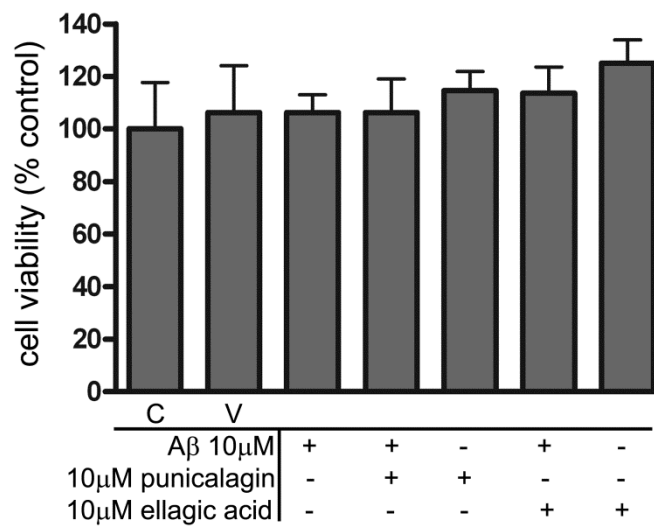

Cell viability was measured using the MTT assay. Values shown are mean  $\pm$  SD, n=3-8.
